# Supplementary material for: A high-energy asynchronously reverse dual-ion battery based on H − /Na + insertion chemistry
Source: Royal Society of Chemistry journal article supplement (doi:10.1039/d5ee06051f), 2026-01-01
Supplement: d5ee06051f1.pdf [file d5ee06051f1.pdf]

## Supplementary Information

### **A high-energy asynchronously reverse dual-ion battery based on $\text{H}^-/\text{Na}^+$ insertion chemistry**

#### **Author Information**

---

Wen Luo,<sup>\*a</sup> Xiangchen Zhang,<sup>b</sup> Hongwei Cai,<sup>b</sup> Houde Xu,<sup>b</sup> Ruixi Chen,<sup>b</sup> Jean-Jacques Gaumet<sup>bc</sup> and Kai Fu<sup>\*ab</sup>

*School of Physics and Mechanics, Wuhan University of Technology, Wuhan 430070, P. R. China. E-mail: luowen\_1991@whut.edu.cn, kaifu@whut.edu.cn*

*State Key Laboratory of Advanced Technology for Materials Synthesis and Processing, Wuhan University of Technology, Wuhan 430070, P. R. China.*

*Laboratoire de Chimie et Physique: Approche Multi-échelles, des Milieux Complexes (LCP-A2MC), Institut Jean Barriol, Université de Lorraine, Metz 57070, France.*

## Experimental Section

**Chemicals and Materials:**  $\text{MnSO}_4 \cdot \text{H}_2\text{O}$ ,  $(\text{NH}_4)_2\text{S}_2\text{O}_8$ , NaCl, tetramethylammonium hydroxide (TMAOH) and NaOH were purchased from Aladdin Co., Ltd. Graphene was purchased from Nanjing XFNANO Materials Tech Co., Ltd. Polyurethane resin dissolved in aromatic solvents and superfine graphite were purchased from Dawu YueHua protective products Co., Ltd. Mg–Y bimetallic alloy target was purchased from Shijiazhuang Huake metal material technology Co., LTD. Pd target was purchased from ZhongNuo Advanced Material (Beijing) Technology Co., Ltd.

**Preparation of  $\gamma\text{-MnO}_2$  powders:**  $\gamma\text{-MnO}_2$  powders were synthesized via hydrothermal methods. Typically, 3.375 g of  $\text{MnSO}_4 \cdot \text{H}_2\text{O}$  was first dissolved in 80 mL DI water, and 4.575 g of  $(\text{NH}_4)_2\text{S}_2\text{O}_8$  was added to the solution. After stirring for 30 min, the mixture solution was transferred to a 100 mL autoclave and then heated at 90 °C for 24 h. After cooling to room temperature, the solid precipitates were collected after centrifuging and washing with DI water eight times to remove the residual salts. The powder was dried overnight at 80 °C.

**Preparation of cathode ink and current collector inks:** The above-prepared  $\gamma\text{-MnO}_2$  powders (40 wt%), Graphene (20 wt%), superfine graphite (10 wt%), acetylene black (10 wt%) were uniformly mixed with polyurethane resin (20 wt%) dissolved in aromatic solvent and then stirring for 30 min. Gel-like cathode ink was obtained. The current collector ink was prepared using the same regime except that the reagent proportion was Graphene (60 wt%), superfine graphite (10 wt%), acetylene black (10 wt%) and polyurethane resin (20 wt%).

**Preparation of planar batteries:** The micro-batteries with designed patterns and dimensions could be easily integrated on flexible substrates in four steps by combining screen printing and magnetron sputtering techniques. Initially, conductive graphene ink was printed onto polyethylene terephthalate (PET) substrates by a screen-printed process to fabricate current collectors with pre-designed planar patterns such as interdigital microelectrodes. Then, Mg–Y alloy thin films with Pd interlayers were deposited on the anodic four fingers through direct current magnetron sputtering technique at room temperature in high purity argon (99.999%) of 0.6 Pa. A thin Pd capping layer of ~20 nm was deposited on top and between 500 nm of Mg–Y alloy films to prevent the anode films from oxidation and to catalyze

hydrogenation/dehydrogenation. Thirdly, the cathode ink containing 40 wt% of  $\gamma$ -MnO<sub>2</sub> was homogeneously mixed and, after that, printed on the cathodic four fingers of the above-fabricated graphene current collectors and dried in a vacuum oven at 80 °C for 12 h. Finally, planar ARDIBs were packaged with polyimide polymer tape coating after adding an aqueous electrolyte onto the projected finger areas. The dose of electrolyte for a full battery was 35  $\mu\text{L cm}^{-2}$ . The pattern and dimension of the planar battery can be adjusted by replacing the screen mesh.

**Material and electrode characterization:** The crystallographic structures of the samples were characterized by X-ray diffraction (XRD) using the Bruker AXS GmbH with a Cu K $\alpha$  X-ray source ( $\lambda=1.5406$  Å). The scanning electron microscopy (SEM) morphology and composition of the electrode materials were characterized by a JEOL-7100F microscope with an energy dispersive spectrometer (EDS) assistant. To investigate the morphological evolution, ex-situ SEM images were acquired from electrodes harvested at different cycle intervals (pristine, 5, 20, 50, 100, and 200 cycles) after washing with deionized water. Scanning transmission electron microscopy with energy-dispersive X-ray spectroscopy (STEM-EDS) mappings were conducted on a Talos F200S (Thermo Scientific) to reveal the intrinsic lattice structure and elemental distribution. For STEM-EDS observations, the cycled electrodes were ultrasonically dispersed in ethanol to remove surface residues. The thin films were directly deposited on Si wafers or TEM grids for SEM and TEM measurements. The TOF-SIMS spectrometry was performed on a PHI nano TOFII Time-of-Flight SIMS instrument. An atomic force microscopy (AFM) map was obtained using SmartSPM (HORIBA). XPS data were collected on an ESCALAB250Xi photoelectron spectrometer (Thermo Fisher Scientific), with all binding energies referenced to the C 1s peak (284.8 eV). Raman spectroscopy was performed using a HORIBA Raman microscope with a 532 nm laser. A customized in-situ cell with an optical window was employed to detect the formation of Pd-H bonds during electrochemical polarization.

**Electrochemical measurements:** GCD and EIS tests were conducted on a CHI760E electrochemistry workstation (Shanghai Chenhua Instrument Co., Ltd., Shanghai, China). Cycle stability tests were performed on the LAND battery test system (CT3001A, Wuhan, China) and Neware battery test system (CT-4008, Shenzhen, China) at 20 °C. The half battery was assembled in a PTFE Swagelok-type three-electrode system, in which a Hg/HgO electrode served as the reference electrode. In this work, all

potential values are converted into values versus standard hydrogen electrodes (SHE). Full batteries were tested using stainless steel holding pins to connect Graphene current collectors with the external circuit linked to the battery test system or electrochemical workstation.

### Note S1: Detailed electrochemical mechanism and closed circuit of H<sup>-</sup>-Na<sup>+</sup> ARDIB

In this note, ‘cathode/anode’ refer to the MnO<sub>2</sub> electrode and Mg-Y electrode, respectively; during charging/discharging their electrochemical roles (oxidation/reduction) interchange. To clarify the charge storage mechanism and the completion of the closed circuit in the H<sup>-</sup>-Na<sup>+</sup> ARDIB, the detailed electrochemical half-reactions and the ionic balance process are described below.

#### (1) Charging process

During the charging process, the system operates as follows to store energy:

**Electron flow** (external circuit). Driven by an external power source, electrons ( $e^-$ ) flow from the MnO<sub>2</sub> cathode through the external circuit to the Mg-Y anode.

**Cathode reaction** (oxidation + cation release). At the cathode, the sodium-intercalated manganese oxide (Na<sub>x</sub>MnO<sub>2</sub>) undergoes oxidation. This process extracts Na<sup>+</sup> ions from the host structure and releases them into the aqueous electrolyte. The half-reaction can be expressed as:

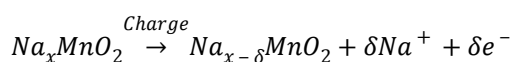

**Anode reaction** (reduction + anion storage via in-situ conversion). At the anode, electrons reduce water molecules on the catalytic Pd surface. Crucially, free H<sup>-</sup> ions do not migrate from the electrolyte. Instead, H<sub>2</sub>O molecules are adsorbed and dissociated; the hydrogen species are reduced in-situ to form H<sup>-</sup> anions, which immediately diffuse into the Mg-Y lattice to form metal hydrides. Simultaneously, OH<sup>-</sup> ions are released into the electrolyte. The half-reaction can be expressed as:

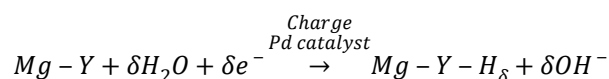

Stepwise anode reaction can be expressed as:

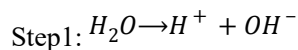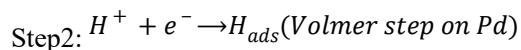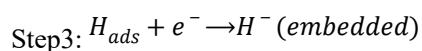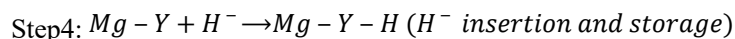

**Ionic flux and closed circuit.** The electrolyte receives Na<sup>+</sup> from the cathode and OH<sup>-</sup> from the anode. These ions diffuse into the bulk solution to maintain local and global electroneutrality. This concurrent release of cations and anions satisfies the condition for a closed ionic circuit without

requiring the thermodynamically impossible migration of  $H^-$  through the aqueous medium.

## (2) Discharging process

During the discharging process, the stored chemical energy is converted back into electrical energy:

**Electron flow** (external circuit). Electrons flow from the Mg-Y anode through the external load to the  $MnO_2$  cathode.

**Anode reaction** (oxidation + anion release/water regeneration). The metal hydrides (Mg-Y-H) are oxidized, releasing stored  $H^-$  which react with  $OH^-$  ions at the interface to regenerate  $H_2O$  molecules and release electrons. The half-reaction can be expressed as:

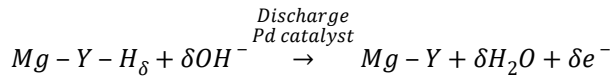

**Cathode reaction** (reduction + cation insertion). The  $MnO_2$  cathode accepts electrons and captures  $Na^+$  ions from the electrolyte. The half-reaction can be expressed as:

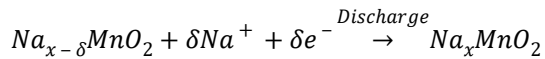

**Ionic Flux and Closed Circuit:** The continuous consumption of  $OH^-$  at the anode and  $Na^+$  at the cathode leads to a decrease in the bulk electrolyte concentration. The ionic balance is maintained by the diffusion of ions from the bulk solution to the electrode interfaces, closing the circuit.

## (3) Electrochemical consistency

This mechanism explicitly demonstrates that the ARDIB configuration strictly adheres to fundamental electrochemical principles:

No violation of ion migration direction:  $Na^+$  and  $OH^-$  move in opposite directions when necessary to balance local charge, consistent with electric field effects in electrolyte.

$H^-$  does not migrate in bulk: It is generated and consumed at the anode/electrolyte interface, avoiding any contradiction with anion transport conventions.

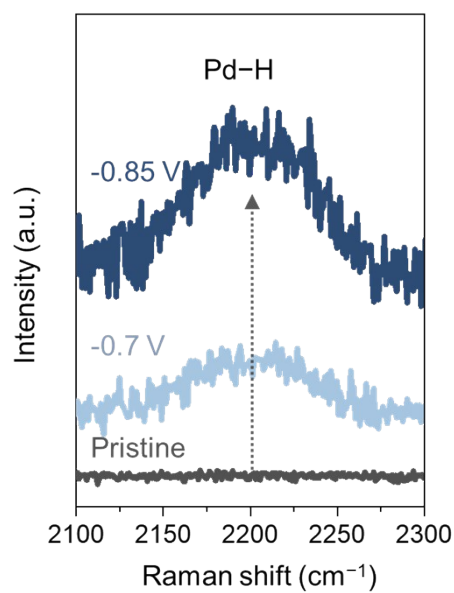

**Figure S1 In situ Raman spectra of Pd-capped Mg-Y alloy anode.**

The band at  $\sim 2200\text{ cm}^{-1}$ , assigned to Pd-H stretching vibrations, progressively intensifies upon cathodic polarization. This result distinctly detects the emergence of Pd-H vibration signals during the charging process, verifying the intermediate catalytic pathway of hydrogen species.

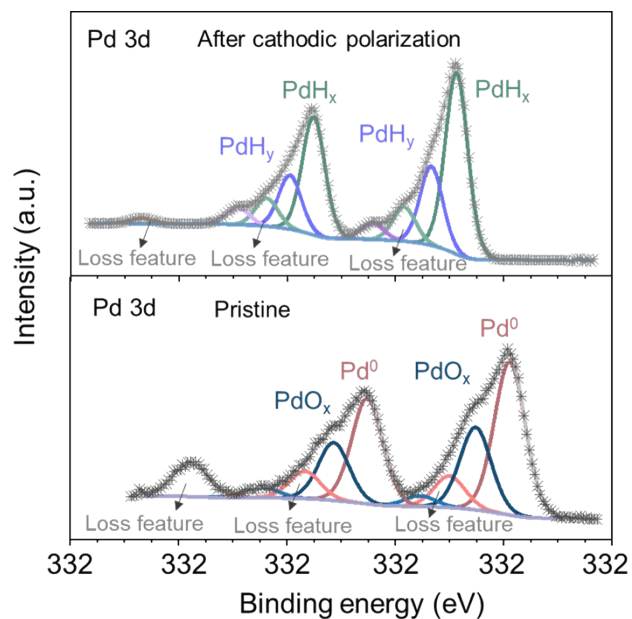

**Figure S2 XPS spectra of Pd 3d for the pristine and cycled anodes.** Upon cathodic polarization (under strong reducing potentials), the spectra reveal an increase in the valence state of Pd. This indicates that Pd is oxidized, accompanied by the reduction of hydrogen to  $\text{H}^-$ , resulting in the formation of palladium hydrides.



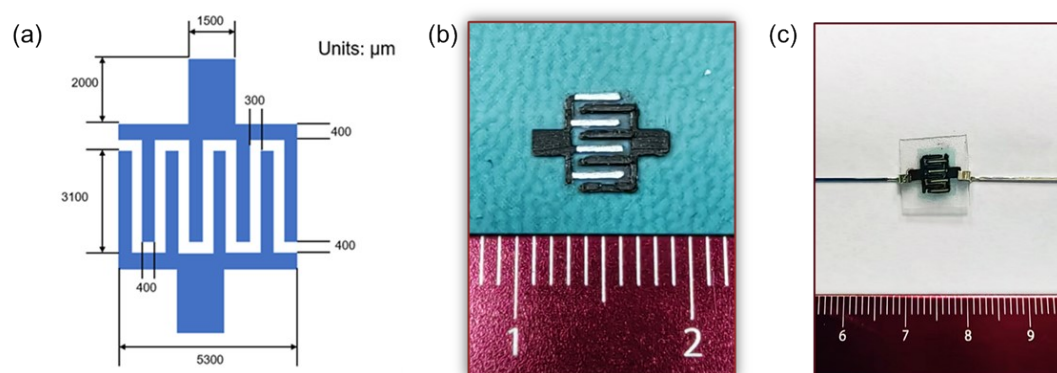

**Figure S3** The designed projection and digital photographs of the micro-battery. (a) The projection and size parameters of a micro-battery. (b) Digital photographs of a micro-battery. (c) Digital photographs of a micro-battery after electrochemical tests.

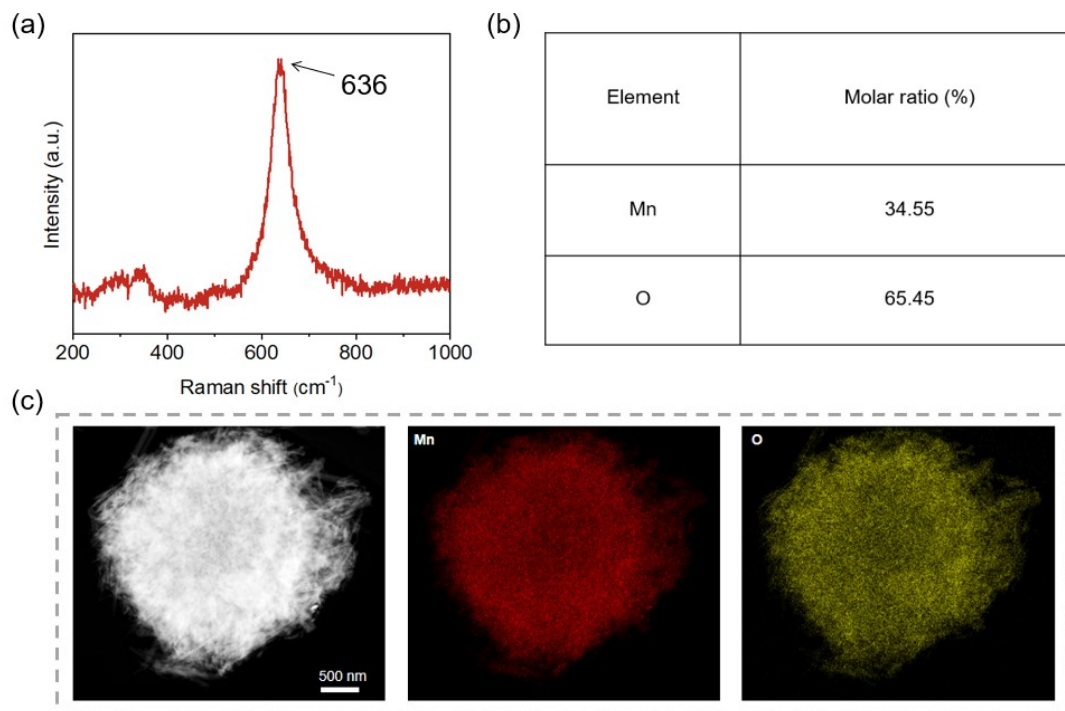

**Figure S4** Characterization for the  $\gamma$ -MnO<sub>2</sub> particles. (a) Raman spectra of MnO<sub>2</sub> sample. The peaks 636 cm<sup>-1</sup> demonstrate characteristic of  $\gamma$ -MnO<sub>2</sub> phase<sup>[1]</sup>. (b) Element composition derived by inductively coupled plasma-atomic emission spectrometry (ICP) and CHNS/O organic element analyses. (c) TEM image and EDS mapping of a  $\gamma$ -MnO<sub>2</sub> particle. Uniform distribution of Mn and O elements was shown in the  $\gamma$ -MnO<sub>2</sub> particle.

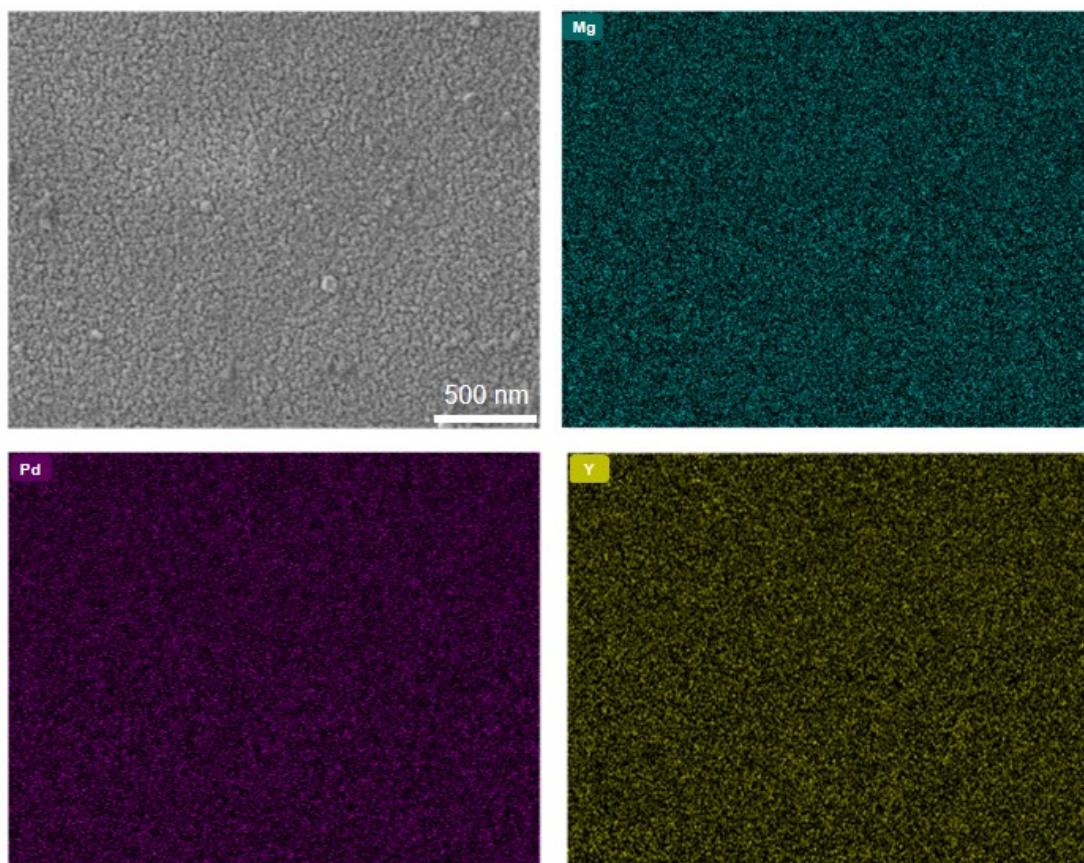

**Figure S5** SEM image and EDS mapping of the Pd capped Mg-Y alloy anode. The SEM image of the top view of the anode shows the uniform distribution of the tiny nanograins. Uniform distribution of Mg, Y and Pd elements was shown in the anode.

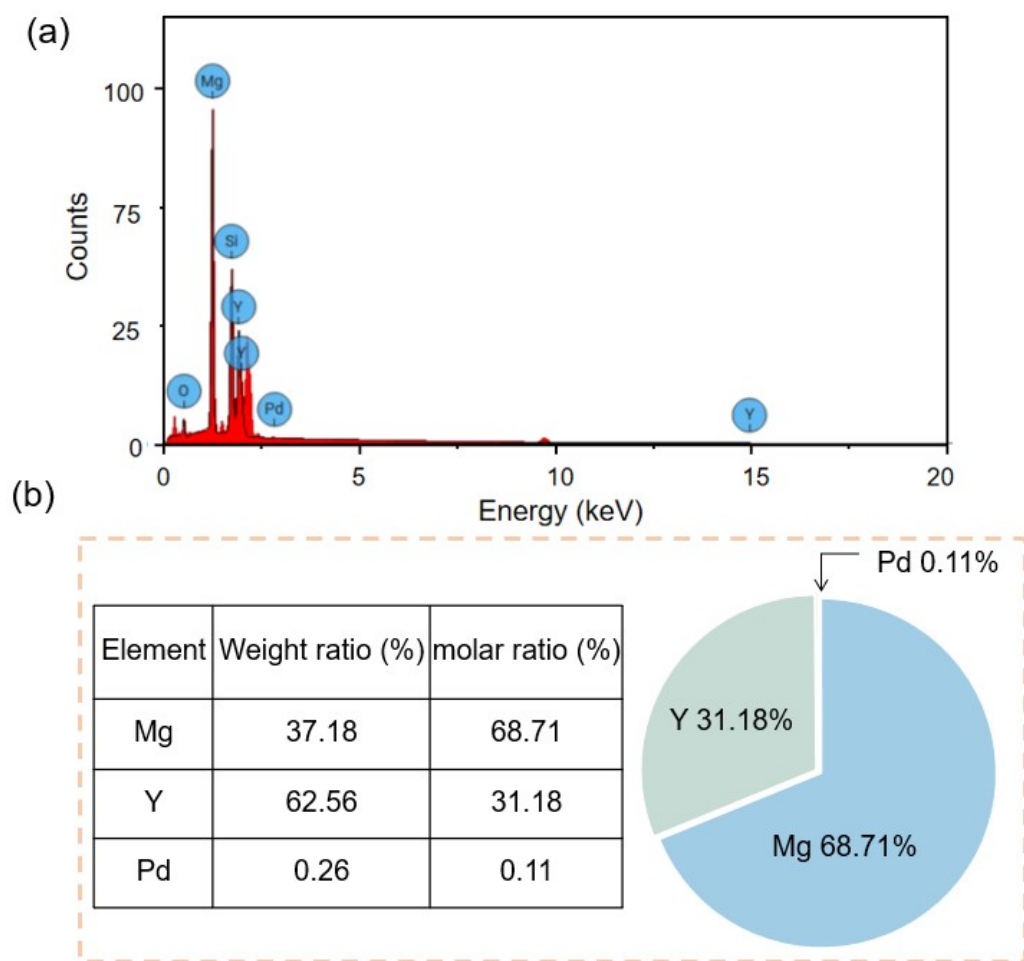

**Figure S6** STEM–EDS analyses of Pd capped Mg-Y alloy anode. (a) EDS spectra of anode. The Si and O signals can be ascribed to the  $\text{SiO}_2$  species on the surface of monocrystalline silicon substrate. (b) The elements proportion of anode. The Mg/Y atomic ratio is 2.2, which is basically consistent with the atomic ratio of  $\text{Mg}_{24}\text{Y}_5$  phase.

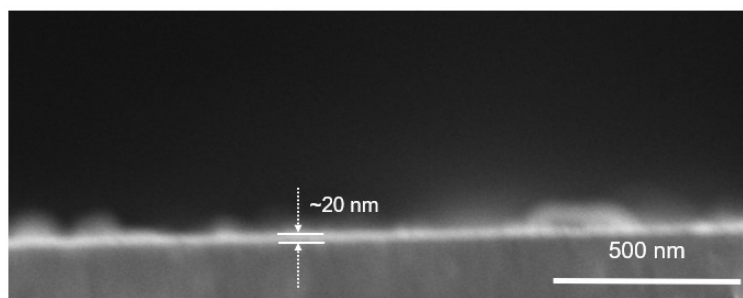

**Figure S7** The SEM image of the cross-section view of the anode. The Pd layer was approximately 20 nm.

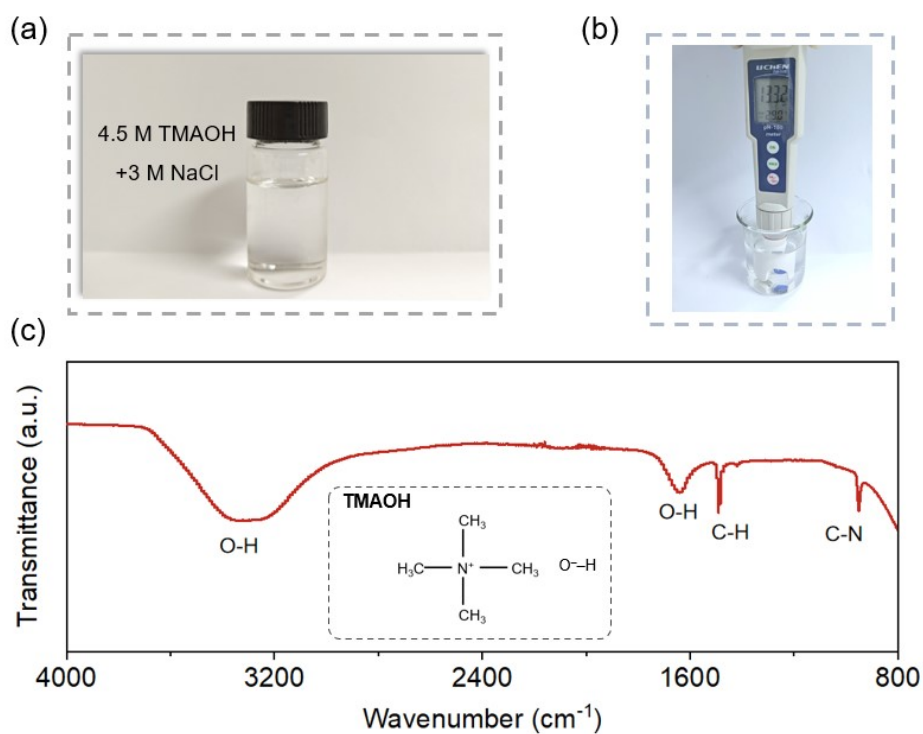

**Figure S8** Characterization for 4.5 M TMAOH+3 M NaCl aqueous electrolyte. (a) Optical photographs of 4.5 M TMAOH+3 M NaCl electrolyte. (b) The pH test. The 4.5 M TMAOH+3 M NaCl electrolyte delivers a suitable alkaline environment (pH value of  $\sim 13$ ). (c) FTIR spectrum. The vibration band at  $3332\text{cm}^{-1}$  and  $1641\text{ cm}^{-1}$  is attributed to the stretching of O–H group, the peak at  $1490\text{ cm}^{-1}$  is attributed to the in-plane bending vibration of C–H group, and the peak at  $950\text{ cm}^{-1}$  is attributed to the stretching vibration of C–N group.

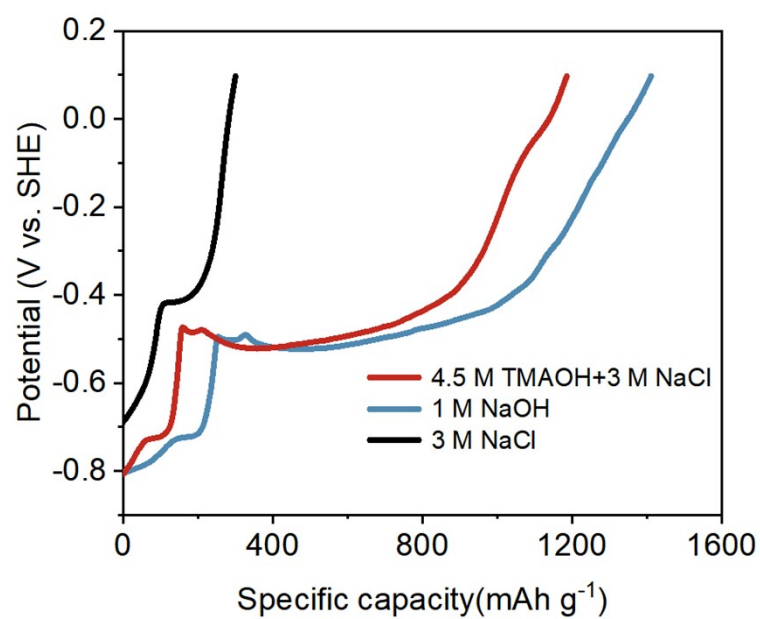

**Figure S9** Charge/discharge curves of the Pd capped Mg-Y alloy anode in different electrolytes at current density of 4 mA cm<sup>-2</sup>.

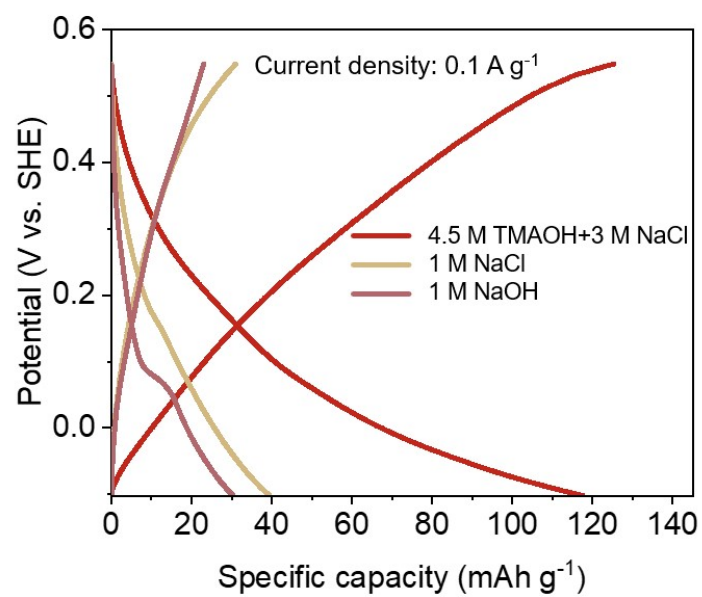

**Figure S10** Charge/discharge curves of  $\gamma$ -MnO<sub>2</sub> cathode in different electrolytes at current density of 0.1 A g<sup>-1</sup>.



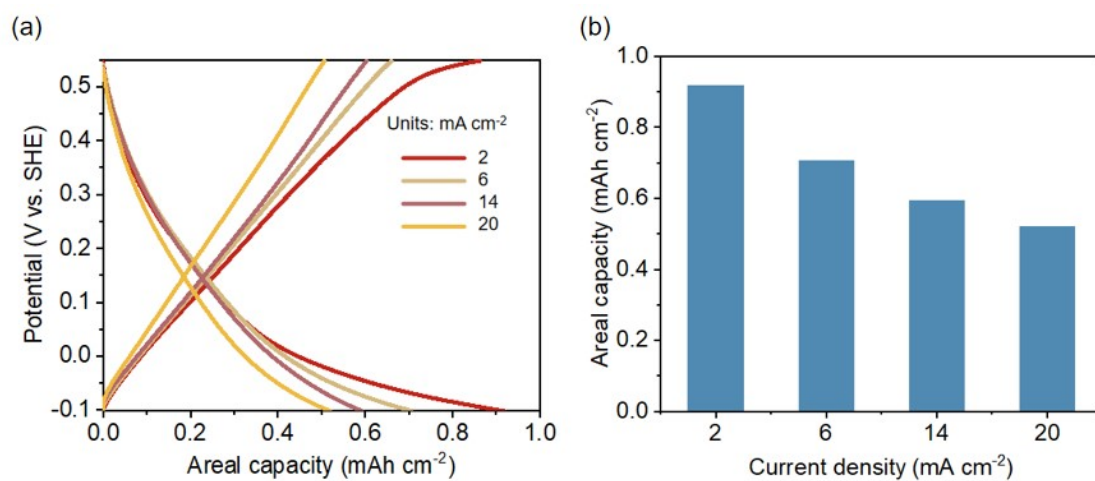

**Figure S11** Rate capability of  $\gamma$ -MnO<sub>2</sub> micro-cathode. (a) Galvanostatic charge/discharge curves of  $\gamma$ -MnO<sub>2</sub> cathode at different current densities. (b) Areal capacities of  $\gamma$ -MnO<sub>2</sub> cathode at different current densities.

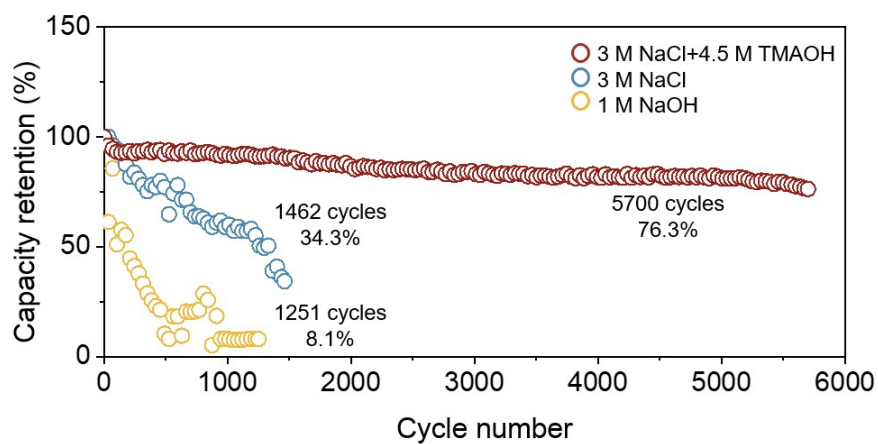

**Figure S12** Cycle performance of  $\text{H}^-$ - $\text{Na}^+$  ARDIB in different electrolytes at current density of  $10 \text{ mA cm}^{-2}$ . The ARDIB exhibits a long lifespan of  $>5700$  cycles with a high capacity retention of 76.3% in the 4.5 M TMAOH+3 M NaCl electrolyte. In contrast, the ARDIBs demonstrate poor cycling performance and failure in 1500 cycles in NaOH and NaCl electrolytes.

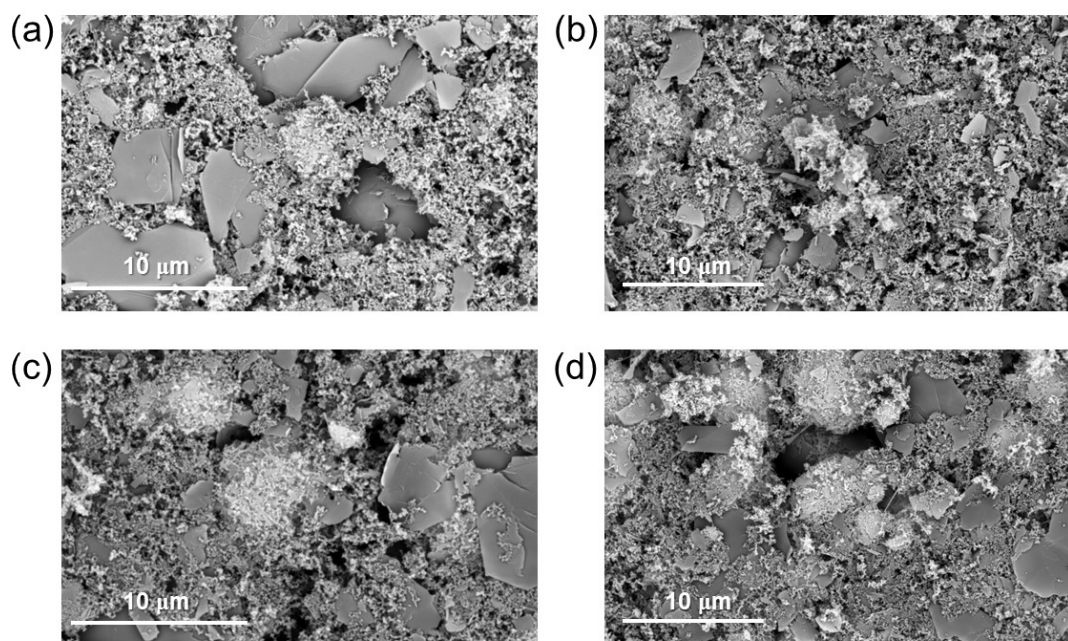

**Figure S13 Assessing the morphological representativeness of the  $\text{MnO}_2$  cathode after 100 cycles.** (a–d) SEM micrographs acquired from four distinct, randomly selected regions of the same electrode. Additional SEM images confirming the representativeness of Fig. 4a (different particles/regions). The qualitative consistency observed across these diverse locations confirms that the reported structural reconstruction is a general and homogeneous phenomenon throughout the electrode surface, rather than an isolated local event.

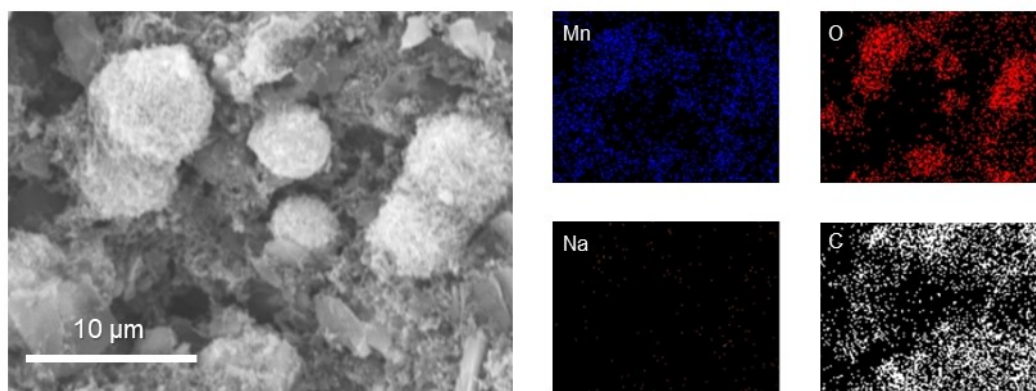

**Figure S14 SEM–EDS elemental mapping of the pristine  $\text{MnO}_2$  cathode (before cycling).** The Na signal is negligible in the pristine state, establishing a baseline and confirming that Na detected after cycling originates from electrochemical insertion rather than pre-existing contamination or sample handling.

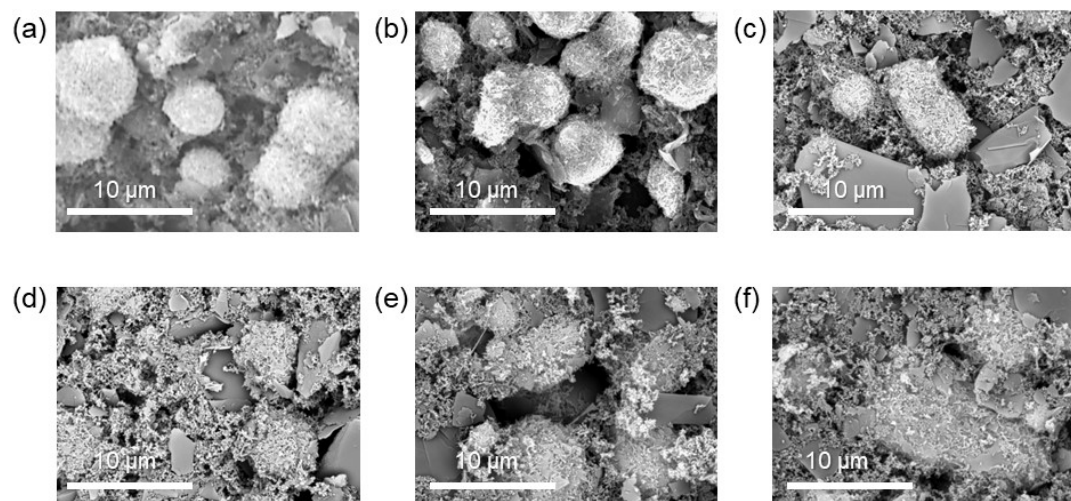

**Figure S15 Representative SEM images of the MnO<sub>2</sub> cathode collected at different cycle numbers. (a) pristine, (b) 5, (c) 20, (d) 50, (e) 100, and (f) 200 cycles.**

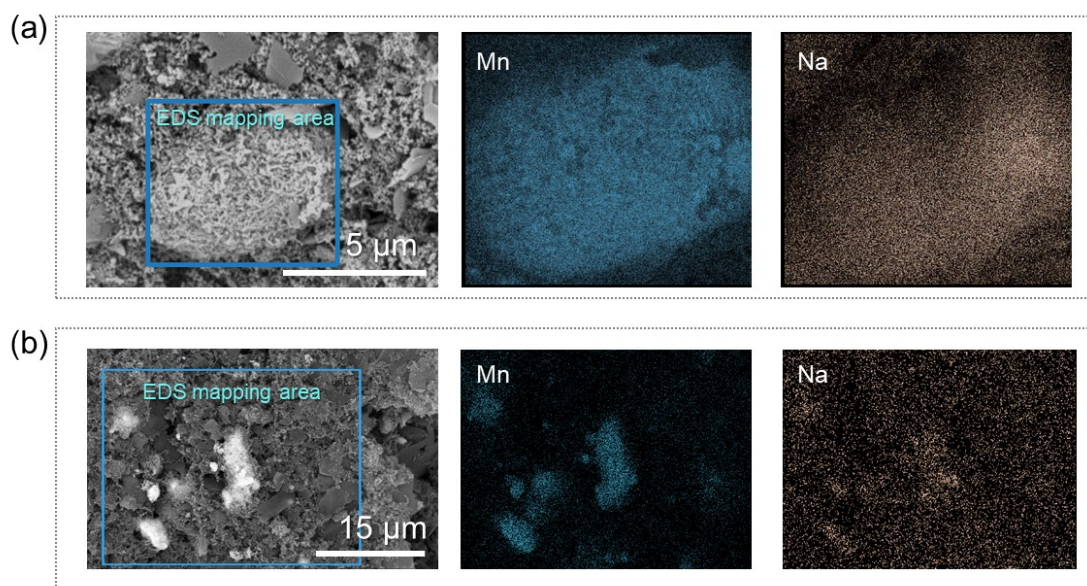

**Figure S16 Multi-scale SEM-EDS analysis of the MnO<sub>2</sub> cathode after 100 cycles.** (a) and (b) represent distinct regions of the same electrode captured at different magnifications, illustrating the spatial distribution of Na.

While a general Na distribution is observed, certain regions (as seen in these representative scans) exhibit localized high-intensity signals or apparent nonuniformity. These inconsistencies are attributed to the inherent surface roughness of the porous electrode, variations in particle thickness, and potential interference from the carbon binder or trace residual electrolyte. This suggests that SEM-EDS alone reflects surface-dominated signals and may not definitively represent the intrinsic lattice-level homogeneity.

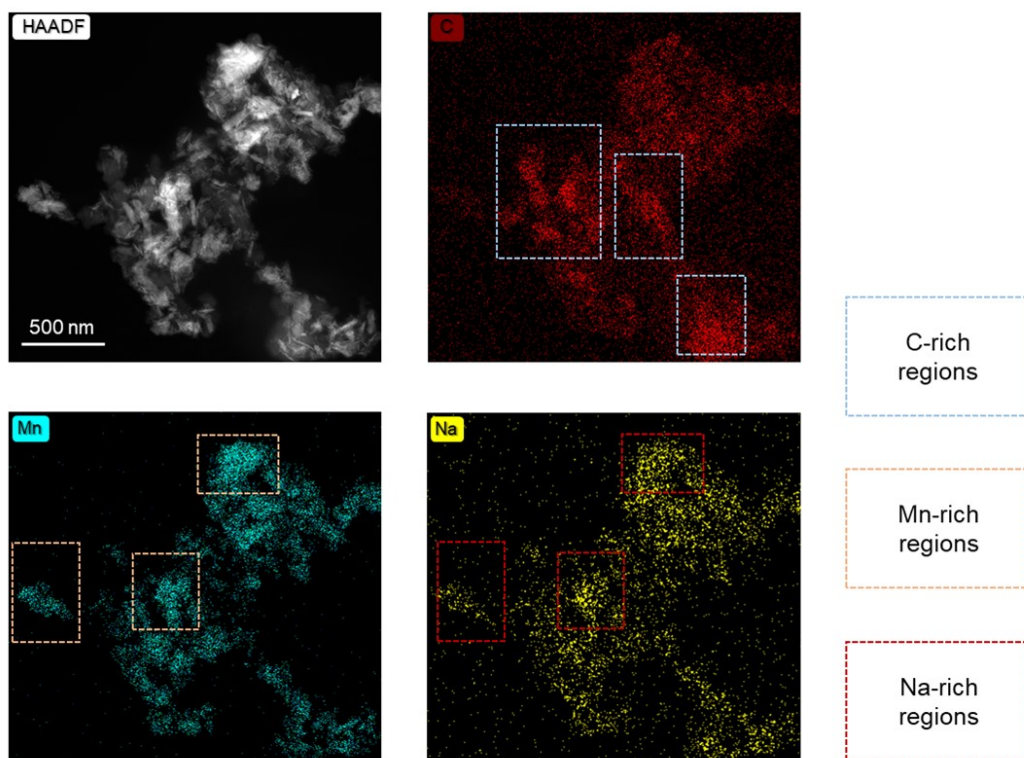

**Figure S17 STEM–EDS mapping of the 100-cycle  $\text{MnO}_2$  cathode (intrinsic Na distribution after cleaning).**

The sample was prepared via ultrasonic dispersion to remove surface residues. The results show that the Na distribution is highly uniform and spatially correlated with the Mn signal (active material) rather than the carbon support. This confirms homogeneous  $\text{Na}^+$  intercalation into the lattice and rules out the formation of irreversible agglomerates.



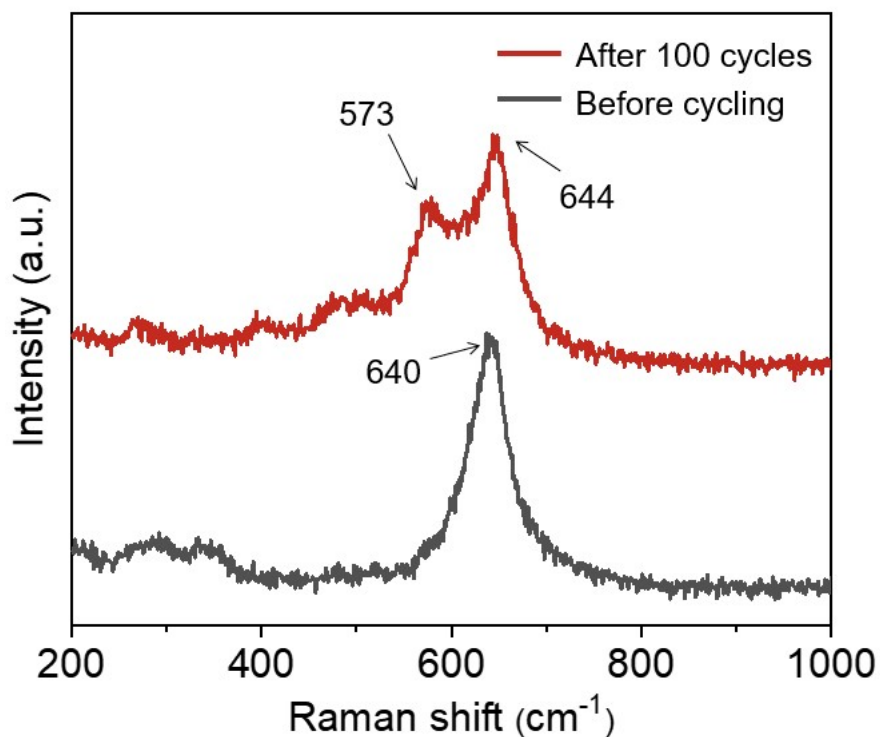

**Figure S18** Raman spectra of pristine cathode and cathode after 100 cycles. The peak at about 573 cm<sup>-1</sup> was definitely deformation modes of Mn-O-Mn chain in  $\delta$ -MnO<sub>2</sub> octahedral lattice, and the strong peak at about 640 cm<sup>-1</sup> was interpreted as Mn-O stretching modes in  $\gamma$ -MnO<sub>2</sub>.<sup>[1]</sup> The new Raman peak at 573 cm<sup>-1</sup> appeared after 100 cycles, indicating the formation of  $\delta$ -MnO<sub>2</sub> phase.<sup>[2]</sup>



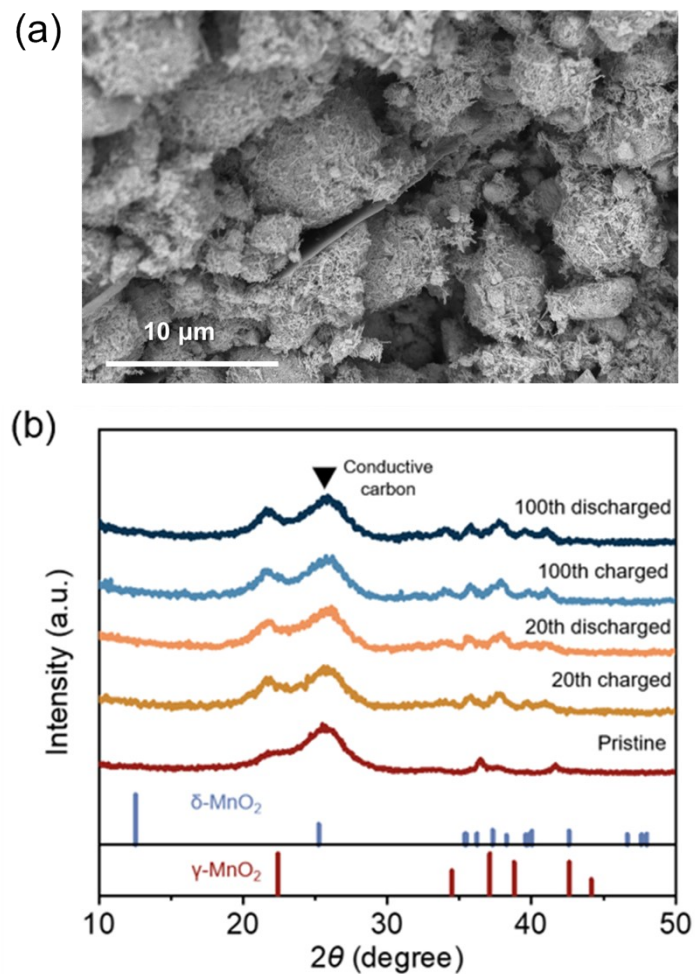

**Figure S19** Structural and morphological characteristic of MnO<sub>2</sub> cathode after 100th cycles in 3 M NaCl aqueous electrolyte. (a) SEM image of the MnO<sub>2</sub> cathode. The MnO<sub>2</sub> particles maintain their sphere-like hierarchical structure. (b) The ex-situ XRD patterns of cathode during cycles. No peak intensities at 12.4° can be observed after 100 cycles. In situ structural evolution of cathode was absent in NaCl aqueous electrolyte without TMAOH additives.

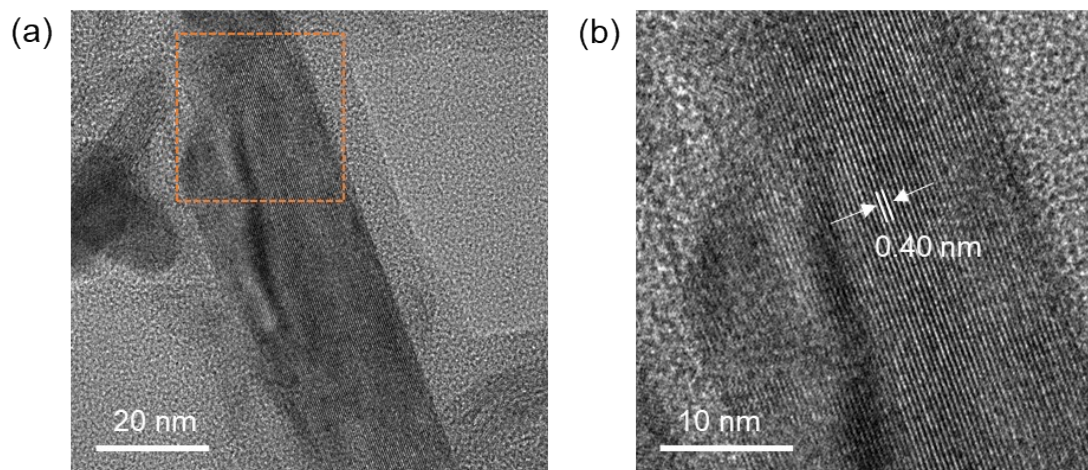

**Figure S20** TEM images of  $\text{MnO}_2$  cathode cycled in 3 M NaCl aqueous electrolyte. (a) Low-magnification TEM image of a  $\text{MnO}_2$  nanosheet. (b) The high-resolution TEM image of the dashed box region in (a). No obvious expansion of interlayer spacing can be observed in the scratched sample from the  $\text{MnO}_2$  electrode with 100 cycles in 3 M NaCl aqueous electrolyte without TMAOH additives.

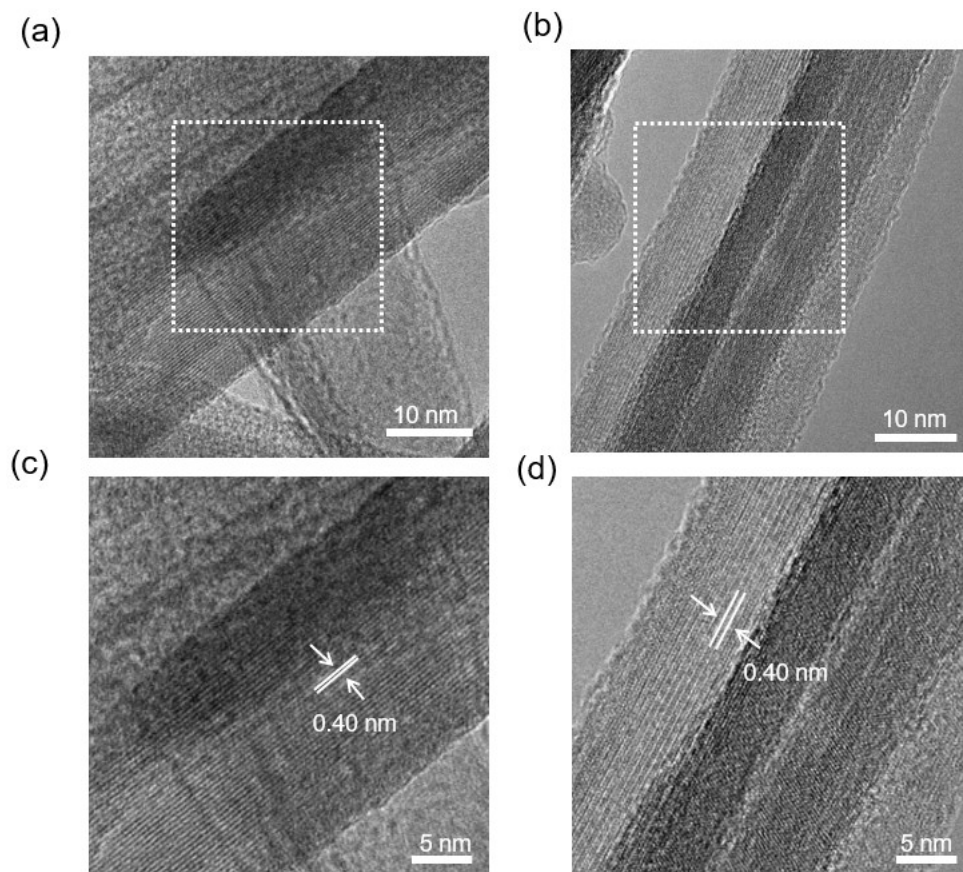

**Figure S21** HRTEM images of scratched sample from the pristine MnO<sub>2</sub> electrode. (a, b) Two selected areas of MnO<sub>2</sub> nanosheets. (c, d) The high-resolution TEM images of the dashed box region in (a) and (b), respectively. The HRTEM image perpendicular to the (101) crystal plane, proving that the interlayer spacing is 0.40 nm before cycling.

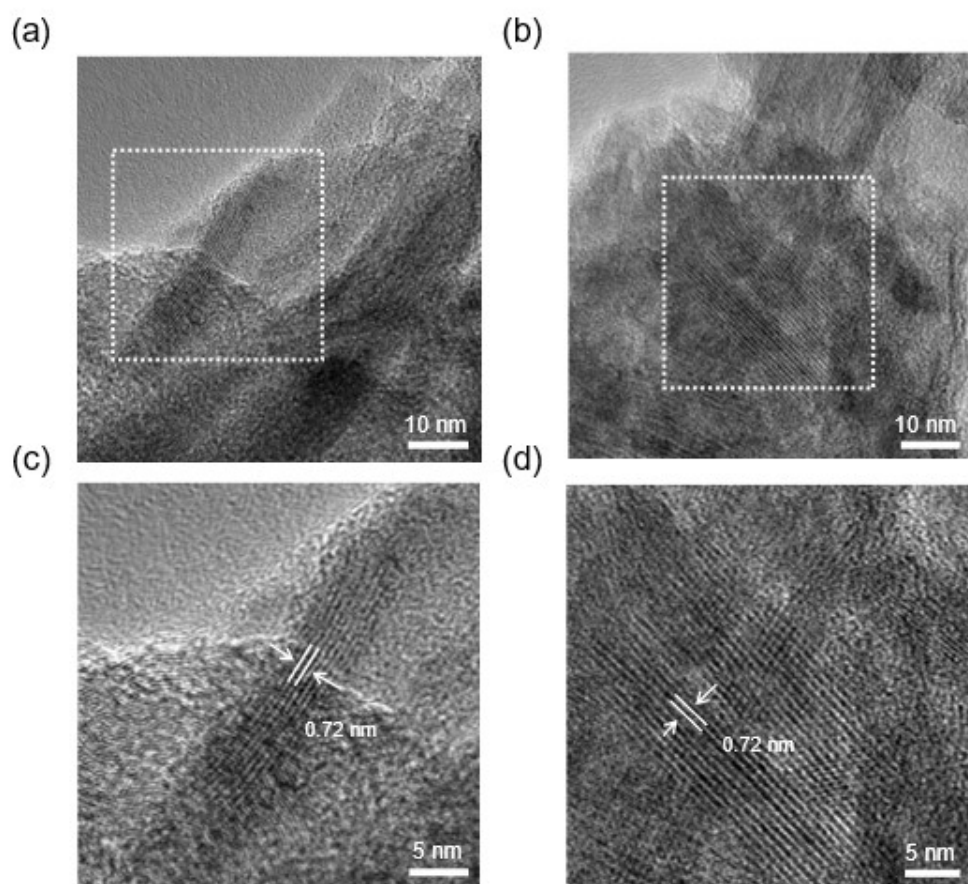

**Figure S22** HRTEM images of scratched sample from the  $\text{MnO}_2$  electrode with 100 cycles in the 4.5 M TMAOH+3 M NaCl electrolyte. (a, b) Two selected areas of  $\text{MnO}_2$  nanosheets. (c,d) The high-resolution TEM images of the dashed box region in (a) and (b), respectively. The HRTEM image perpendicular to the (101) crystal plane, proving that the interlayer spacing is 0.40 nm before cycling. The interlayer spacing of the scratched sample from the  $\text{MnO}_2$  electrode expanded to 7.1 Å after 100 cycles. The insertion of large-sized  $\text{TMA}^+$  leads to interlayer expansion, which promotes morphological reconstruction and stabilizes the lamellar structure.

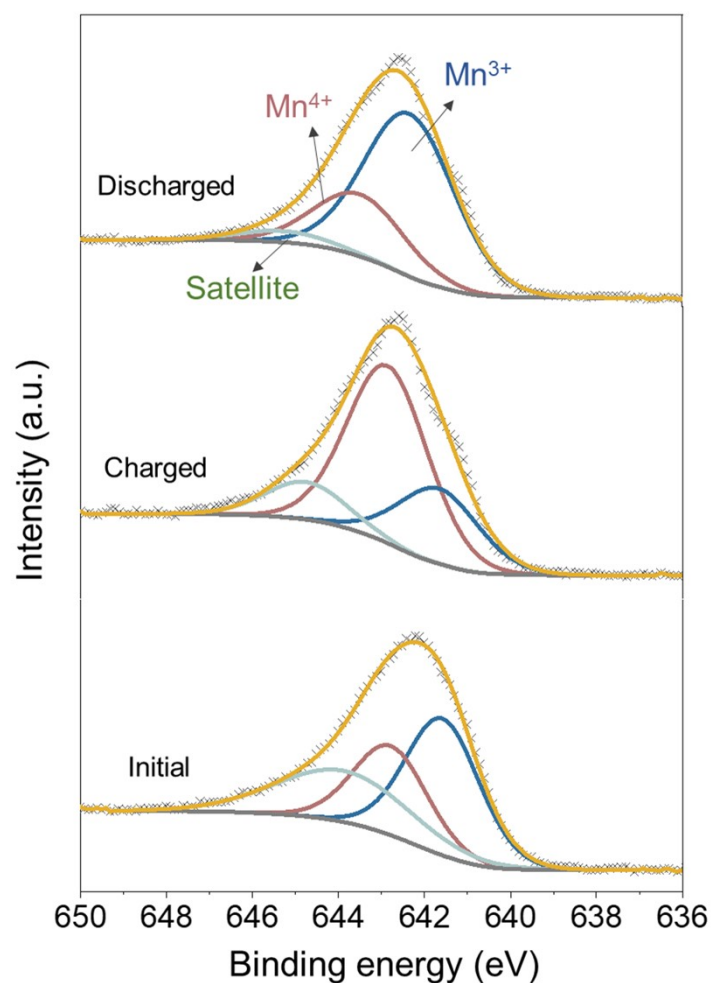

**Figure S23 Ex-situ high-resolution XPS spectra of the Mn 2p region for the MnO<sub>2</sub> cathode at different states of charge (pristine, fully discharged, and fully charged).**

The spectra reveal a reversible evolution of the manganese valence state. Upon discharge (Na<sup>+</sup> insertion), the Mn peaks shift to lower binding energy, indicating the reduction of Mn<sup>4+</sup> to Mn<sup>3+</sup>. Upon charge (Na<sup>+</sup> extraction), the peaks recover to higher binding energy. These results corroborate the proposed Na<sup>+</sup> ions intercalation/deintercalation mechanism involving the Mn<sup>3+</sup>/Mn<sup>4+</sup> redox couple.

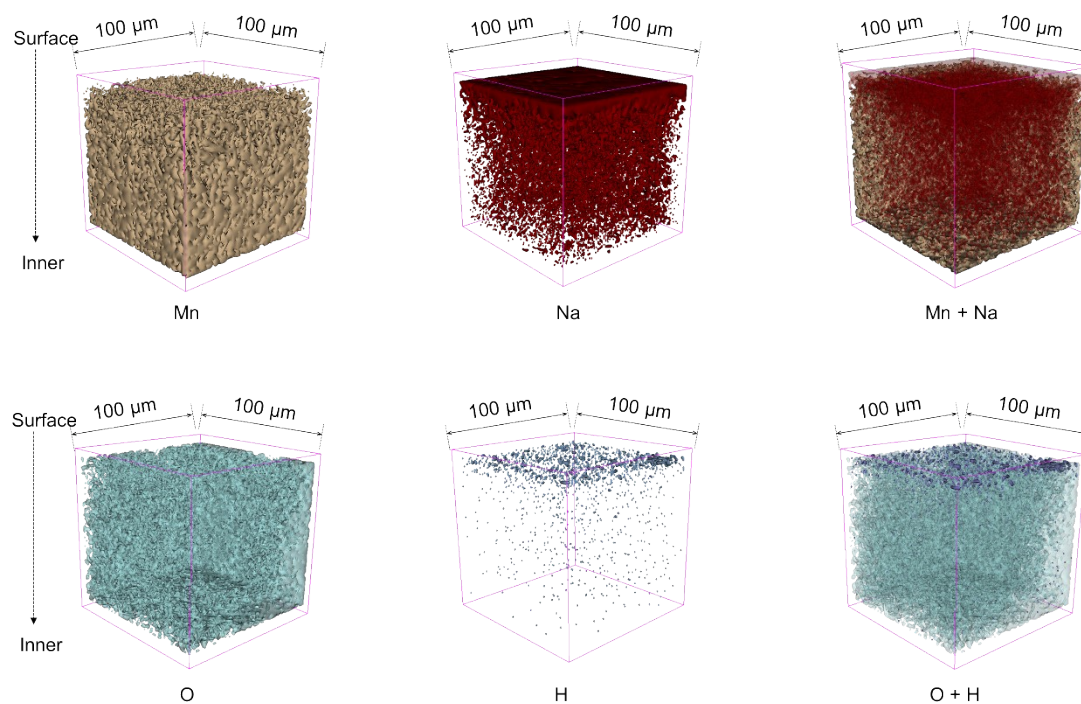

**Figure S24** The 3D reconstructions of the species signal distribution in discharged  $\text{MnO}_2$  cathode.

$\text{H}^-$  ions were only concentrated on the surface of the cathode. In comparison, the  $\text{Na}^+$  ions distributed throughout the investigation depth, and coincides with the signal of  $\text{Mn}^+$  and  $\text{O}^-$  fragments, implying that  $\text{Na}^+$  ions are charge carriers in  $\text{MnO}_2$  cathode materials.

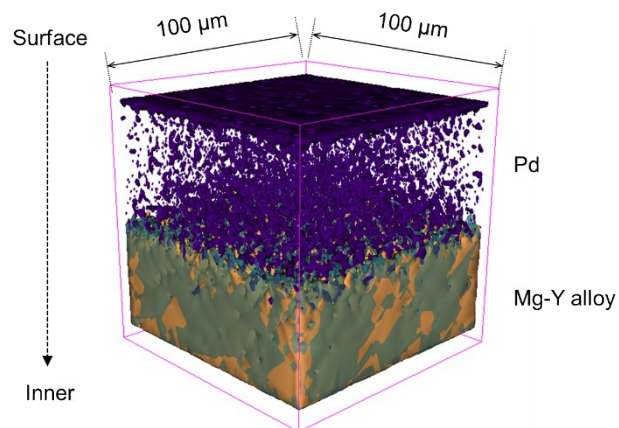

**Figure S25** The 3D reconstructions of the species signal distribution in pristine anode. The Pd thin film is capped onto the Mg-Y alloy layer. Pd (purple), Mg (green), Y (orange).



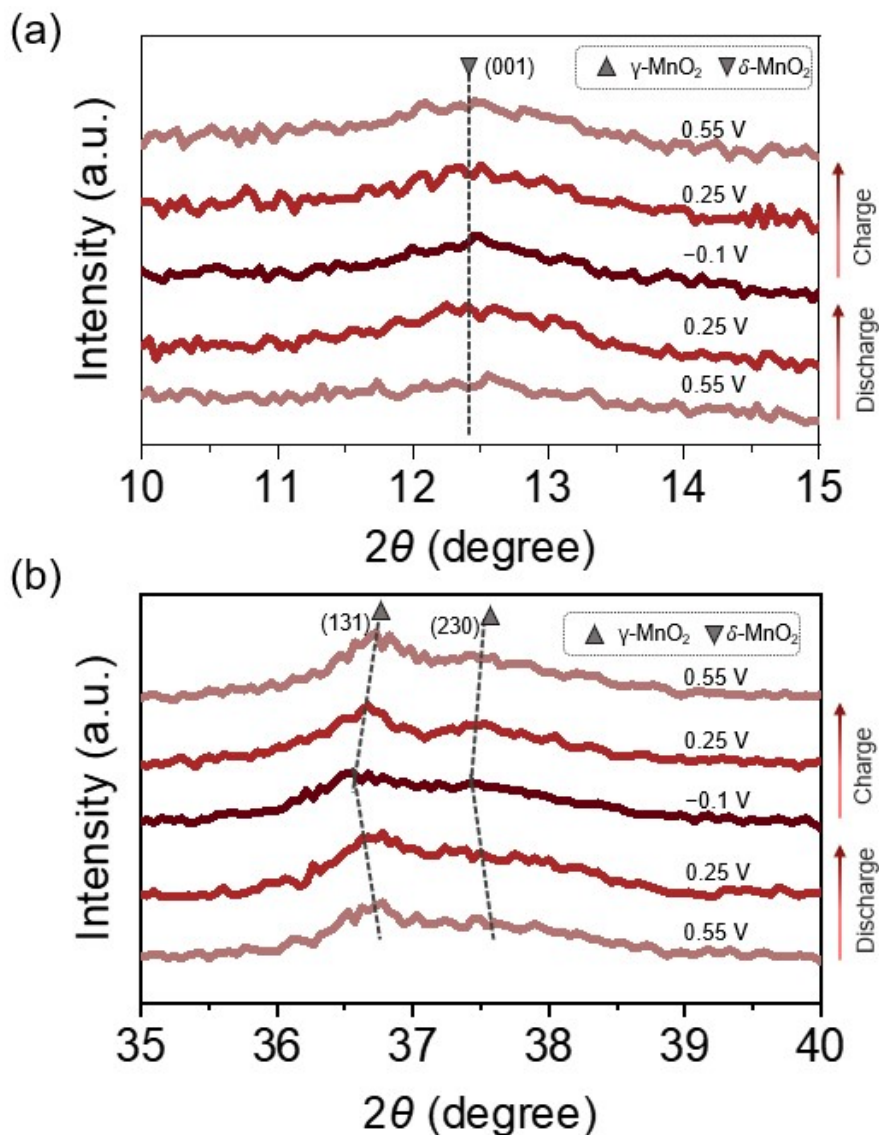

**Figure S26** Partially enlarged images of the XRD patterns. (a) Ex-situ XRD patterns of (002) plane of  $\delta$ - $\text{MnO}_2$  phase at varied discharge/charge states. (b) Ex-situ XRD patterns of (131) and (230) plane of  $\gamma$ - $\text{MnO}_2$  phase at varied discharge/charge states. The diffraction peak around  $12.5^\circ$ , corresponding to lamellar structure with interlayer distance of  $\sim 7.1 \text{ \AA}$  in  $\delta$ - $\text{MnO}_2$ , shows nearly no position change during the entire  $\text{Na}^+$  ion insertion and extraction processes, indicating that the interlamellar spacing was maintained, which is primarily due to the pillar effect of intercalation of large-sized  $\text{TMA}^+$  ions. The peaks belonging to  $\gamma$ - $\text{MnO}_2$  phase slightly shift to lower angles during discharging and return to higher angles during charging, suggesting that the  $\gamma$ - $\text{MnO}_2$  phase undergoes slight lattice expansion during  $\text{Na}^+$  ion insertion and reversible lattice shrinkage on  $\text{Na}^+$  ion extraction.



**Table S1 | Closed-circuit mechanism of H<sup>-</sup>-Na<sup>+</sup> ARDIB.**

| Charge           |                                                                                                           |                                                    |
|------------------|-----------------------------------------------------------------------------------------------------------|----------------------------------------------------|
| Component        | Process                                                                                                   | Charge balance                                     |
| External circuit | e <sup>-</sup> flows from cathode → external circuit → anode                                              | Completes electrical circuit                       |
| Cathode          | $Na_xMnO_2 \xrightarrow{Charge} Na_{x-\delta}MnO_2 + \delta Na^+ + \delta e^-$                            | Releases Na <sup>+</sup> and e <sup>-</sup>        |
| Anode            | $Mg-Y + \delta H_2O + \delta e^- \xrightarrow[\text{Pd catalyst}]{Charge} Mg-Y-H_\delta + \delta OH^-$    | Consumes e <sup>-</sup> ; releases OH <sup>-</sup> |
| Electrolyte      | Na <sup>+</sup> migrates toward anode<br>OH <sup>-</sup> migrates toward cathode                          | Neutralizes electrode charge states                |
| Discharge        |                                                                                                           |                                                    |
| Component        | Process                                                                                                   | Charge balance                                     |
| External circuit | e <sup>-</sup> flows from anode → external circuit → cathode                                              | Delivers energy to load                            |
| Anode            | $Mg-Y-H_\delta + \delta OH^- \xrightarrow[\text{Pd catalyst}]{Discharge} Mg-Y + \delta H_2O + \delta e^-$ | Releases e <sup>-</sup> ; consumes OH <sup>-</sup> |
| Cathode          | $Na_{x-\delta}MnO_2 + \delta Na^+ + \delta e^- \xrightarrow{Discharge} Na_xMnO_2$                         | Consumes Na <sup>+</sup> and e <sup>-</sup>        |
| Electrolyte      | Na <sup>+</sup> migrates toward cathode<br>OH <sup>-</sup> migrates toward anode                          | Neutralizes electrode charge states                |

**Table S2 | Energy densities and power densities of different micro-battery systems and our full cell at various current densities.**

| Electrode material<br>(cathode// anode)                                                                        | Carrier                         | Electrolyte                                                                 | Energy density<br>(mWh cm <sup>-2</sup> ) | Power density<br>(mW cm <sup>-2</sup> ) | Ref.      |
|----------------------------------------------------------------------------------------------------------------|---------------------------------|-----------------------------------------------------------------------------|-------------------------------------------|-----------------------------------------|-----------|
| This work                                                                                                      | H <sup>-</sup> /Na <sup>+</sup> | TMAOH+NaCl<br>solution                                                      | 0.43                                      | 1                                       | This work |
|                                                                                                                |                                 |                                                                             | 0.24                                      | 4.5                                     |           |
|                                                                                                                |                                 |                                                                             | 0.21                                      | 5.9                                     |           |
|                                                                                                                |                                 |                                                                             | 0.15                                      | 8.0                                     |           |
|                                                                                                                |                                 |                                                                             | 0.11                                      | 18.92                                   |           |
|                                                                                                                |                                 |                                                                             | 0.080                                     | 30.81                                   |           |
| Na <sub>3</sub> V <sub>2</sub> (PO <sub>4</sub> ) <sub>3</sub> /Na <sub>2</sub> Ti <sub>3</sub> O <sub>7</sub> | Na <sup>+</sup>                 | NaBF <sub>4</sub> -EMIMBF <sub>4</sub> -<br>PVDF-HFP ionogel<br>electrolyte | 0.15                                      | 0.072                                   | [3]       |
|                                                                                                                |                                 |                                                                             | 0.13                                      | 0.14                                    |           |
|                                                                                                                |                                 |                                                                             | 0.10                                      | 0.32                                    |           |
|                                                                                                                |                                 |                                                                             | 0.071                                     | 0.66                                    |           |
|                                                                                                                |                                 |                                                                             | 0.058                                     | 0.99                                    |           |
|                                                                                                                |                                 |                                                                             | 0.051                                     | 1.32                                    |           |
| CuHCF//FeHCF                                                                                                   | Li <sup>+</sup>                 | LiCl/PVA                                                                    | 0.044                                     | 1.95                                    | [4]       |
|                                                                                                                |                                 |                                                                             | 0.0091                                    | 0.068                                   |           |
|                                                                                                                |                                 |                                                                             | 0.0081                                    | 0.14                                    |           |
|                                                                                                                |                                 |                                                                             | 0.0067                                    | 0.33                                    |           |
|                                                                                                                |                                 |                                                                             | 0.0057                                    | 0.68                                    |           |
|                                                                                                                |                                 |                                                                             | 0.0044                                    | 1.34                                    |           |
| MnHCF//MnOx/ErGO                                                                                               | Li <sup>+</sup>                 | LiCl/PVA                                                                    | 0.0024                                    | 3.43                                    | [5]       |
|                                                                                                                |                                 |                                                                             | 0.0020                                    | 6.53                                    |           |
|                                                                                                                |                                 |                                                                             | 0.0019                                    | 13.44                                   |           |
|                                                                                                                |                                 |                                                                             | 0.0018                                    | 0.050                                   |           |
|                                                                                                                |                                 |                                                                             | 0.0016                                    | 0.097                                   |           |
|                                                                                                                |                                 |                                                                             | 0.0015                                    | 0.15                                    |           |
| LiFePO <sub>4</sub> // Li <sub>4</sub> Ti <sub>5</sub> O <sub>12</sub>                                         | Li <sup>+</sup>                 | LiTFSI-P <sub>14</sub> TFSI-<br>PVDF-HFP ionogel<br>electrolyte             | 0.0018                                    | 0.19                                    | [6]       |
|                                                                                                                |                                 |                                                                             | 0.0016                                    | 0.257                                   |           |
|                                                                                                                |                                 |                                                                             | 0.0015                                    | 0.49                                    |           |
|                                                                                                                |                                 |                                                                             | 0.15                                      | 0.035                                   |           |
|                                                                                                                |                                 |                                                                             | 0.12                                      | 0.071                                   |           |
|                                                                                                                |                                 |                                                                             | 0.099                                     | 0.10                                    |           |
| MXene-TiS <sub>2</sub> //MWCNTs-<br>VO <sub>2</sub> (B)                                                        | Zn <sup>2+</sup>                | ZnSO <sub>4</sub> -PAM<br>hydrogel electrolyte                              | 0.082                                     | 0.13                                    | [7]       |
|                                                                                                                |                                 |                                                                             | 0.072                                     | 0.11                                    |           |
|                                                                                                                |                                 |                                                                             | 0.054                                     | 0.25                                    |           |
|                                                                                                                |                                 |                                                                             | 0.040                                     | 0.30                                    |           |
|                                                                                                                |                                 |                                                                             | 0.019                                     | 0.43                                    |           |
|                                                                                                                |                                 |                                                                             | 0.033                                     | 0.23                                    |           |
|                                                                                                                |                                 |                                                                             | 0.026                                     | 0.43                                    |           |
|                                                                                                                |                                 |                                                                             | 0.022                                     | 0.60                                    |           |
|                                                                                                                |                                 |                                                                             | 0.019                                     | 0.80                                    |           |
|                                                                                                                |                                 |                                                                             |                                           |                                         |           |

|                       |                  |                                           |                                                    |                                             |      |
|-----------------------|------------------|-------------------------------------------|----------------------------------------------------|---------------------------------------------|------|
|                       |                  |                                           | 0.017<br>0.016                                     | 1.00<br>1.17                                |      |
| Active carbon//Zn     | Zn <sup>2+</sup> | ZnSO <sub>4</sub><br>solution             | 0.12<br>0.11<br>0.11<br>0.10<br>0.087              | 0.40<br>0.80<br>0.16<br>1.58<br>3.89        | [8]  |
| CNT//Zn               | Zn <sup>2+</sup> | ZnSO <sub>4</sub> gel<br>electrolyte      | 0.030<br>0.027<br>0.026<br>0.025<br>0.024<br>0.023 | 0.80<br>1.58<br>2.4<br>3.14<br>3.92<br>7.86 | [9]  |
| PANI//Zn              | Zn <sup>2+</sup> | ZnCl <sub>2</sub> /PVA                    | 0.22<br>0.20<br>0.18<br>0.17<br>0.13               | 0.21<br>0.41<br>0.61<br>0.85<br>1.04        | [10] |
| MnO <sub>2</sub> //Zn | Zn <sup>2+</sup> | ZnCl <sub>2</sub> -MnSO <sub>4</sub> /PVA | 0.16<br>0.14<br>0.11<br>0.075<br>0.047             | 0.18<br>0.46<br>0.95<br>1.78<br>4.49        | [11] |

**Table S3 | Performance comparison between the H<sup>-</sup>-Na<sup>+</sup> ARDIB and traditional reverse dual-ion batteries (RDIBs).**

| Electrolyte                | Anodic carrier/<br>Anode material          | Anode<br>capacity        | Cathodic carrier/<br>Cathode material                                 | Cathode<br>capacity     | Medium<br>voltage (V) | Ref.         |
|----------------------------|--------------------------------------------|--------------------------|-----------------------------------------------------------------------|-------------------------|-----------------------|--------------|
| 30 m ZnCl <sub>2</sub>     | ZnCl <sub>4</sub> <sup>2-</sup> /ferrocene | 144 mAh g <sup>-1</sup>  | Zn <sup>2+</sup> /Zn <sub>3</sub> [Fe(CN) <sub>6</sub> ] <sub>2</sub> | 65 mAh g <sup>-1</sup>  | 0.9                   | [12]         |
| 1 M KOH                    | OH <sup>-</sup> /VN                        | 251 mF cm <sup>-2</sup>  | K <sup>+</sup> /K <sub>x</sub> Mn <sub>8</sub> O <sub>16</sub>        | 824 mF cm <sup>-2</sup> | 0.9                   | [13]         |
| 10 m ZnCl <sub>2</sub>     | ZnCl <sub>4</sub> <sup>2-</sup> /ferrocene | 35 mAh g <sup>-1</sup>   | Zn <sup>2+</sup> /Zn <sub>3</sub> [Fe(CN) <sub>6</sub> ] <sub>2</sub> | 67 mAh g <sup>-1</sup>  | 0.9                   | [14]         |
| 0.8 M NaF                  | F <sup>-</sup> /BiF <sub>3</sub>           | –                        | Na <sup>+</sup> /Na <sub>0.44</sub> MnO <sub>2</sub>                  | 137 mAh g <sup>-1</sup> | 0.8                   | [15]         |
| 1 M NaCl                   | Cl <sup>-</sup> /Polypyrrole               | 67 mAh g <sup>-1</sup>   | Na <sup>+</sup> /Na <sub>0.44</sub> MnO <sub>2</sub>                  | –                       | 0.8                   | [16]         |
| 3 M<br>NaCl+4.5 M<br>TMAOH | H <sup>-</sup> /Pd-capped Mg-<br>Y alloys  | 1185 mAh g <sup>-1</sup> | Na <sup>+</sup> /γ-MnO <sub>2</sub>                                   | 118 mAh g <sup>-1</sup> | 1.0                   | This<br>work |

## References

---

- [1] C. Wang, Y. Zeng, X. Xiao, S. Wu, G. Zhong, K. Xu, Z. Wei, W. Su, X. Lu, *J. Energy Chem.* 2020, **43**, 182.
- [2] J. Wang, J.-G. Wang, H. Liu, Z. You, Z. Li, F. Kang, B. Wei, *Adv. Funct. Mater.* 2021, **31**, 2007397.
- [3] S. Zheng, H. Huang, Y. Dong, S. Wang, F. Zhou, J. Qin, C. Sun, Y. Yu, Z.-S. Wu, X. Bao, *Energy Environ. Sci.* 2020, **13**, 821.
- [4] Y. He, P. Zhang, M. Wang, F. Wang, D. Tan, Y. Li, X. Zhuang, F. Zhang, X. Feng, *Mater. Horiz.* 2019, **6**, 1041.
- [5] J. Liang, B. Tian, S. Li, C. Jiang, W. Wu, *Adv. Energy Mater.* 2020, **10**, 2000022.
- [6] S. Zheng, H. Wang, P. Das, Y. Zhang, Y. Cao, J. Ma, S. Liu, Z.-S. Wu, *Adv. Mater.* 2021, **33**, 2005449.
- [7] B. Zhao, S. Wang, Q. Yu, Q. Wang, M. Wang, T. Ni, L. Ruan, W. Zeng, *J. Power Sources.* 2021, **504**, 230076.
- [8] P. Zhang, Y. Li, G. Wang, F. Wang, S. Yang, F. Zhu, X. Zhuang, O. G. Schmidt, X. Feng, *Adv. Mater.* 2019, **31**, 1806005.
- [9] G. Sun, H. Yang, G. Zhang, J. Gao, X. Jin, Y. Zhao, L. Jiang, L. Qu, *Energy Environ. Sci.* 2018, **11**, 3367.
- [10] R. Li, L. Li, R. Jia, K. Jiang, G. Shen, D. Chen, *Small Methods* 2020, **4**, 2000363.
- [11] H. Wang, R. Guo, H. Li, J. Wang, C. Du, X. Wang, Z. Zheng, *Chem. Eng. J.* 2022, **429**, 132196.
- [12] X. Wu, Y. Xu, C. Zhang, D. P. Leonard, A. Markir, J. Lu and X. Ji, *J. Am. Chem. Soc.*, 2019, **141**, 6338-6344.
- [13] C. L. Shi, J. L. Sun, F. Q. Ji, W. J. Chen, Y. Y. Pang and B. T. Liu, *Iscience*, 2022, **25**, 104141.
- [14] A. Sethi, A. Kumar U and V. M. Dhavale, *ChemPhysChem*, 2023, **24**, e202300098.
- [15] Z. Zhang, X. Hu, Y. Zhou, S. Wang, L. Yao, H. Pan, C.-Y. Su, F. Chen and X. Hou, *J. Mater. Chem. A*, 2018, **6**, 8244-8250.
- [16] H. Kong, M. Yang, Y. Miao and X. Zhao, *Energy Technology*, 2019, **7**, 1900835.
